# Supplementary material for: Decellularization of porcine kidney with submicellar concentrations of SDS results in the retention of ECM proteins required for the adhesion and maintenance of human adult renal epithelial cells
Source: Royal Society of Chemistry journal article supplement (doi:10.1039/d1bm01017d), 2022-01-01
Supplement: d1bm01017d1.xlsx [file d1bm01017d1.xlsx]

## Sheet: Pico Green Raw Data
Sample	ng DNA/ mg tissue
Whole Porcine Kidney Cortex	17400.1	23145.4
0.05% SDS	533.206	322.922
0.075% SDS	246.853	290.615
0.1% SDS	106.729	360.638
1% SDS	582.714	562.932
