# Supplementary material for: Decellularization of porcine kidney with submicellar concentrations of SDS results in the retention of ECM proteins required for the adhesion and maintenance of human adult renal epithelial cells
Source: Royal Society of Chemistry journal article supplement (doi:10.1039/d1bm01017d), 2022-01-01
Supplement: d1bm01017d2.xlsx [file d1bm01017d2.xlsx]

## Sheet: GAG Assay Raw Data
Sample	µg/ mg dry weight
Whole Porcine Kidney	15.4411	14.1625	11.6013
0.05% SDS	8.9888	9.1475	6.94367
0.075% SDS	4.9285	2.3667	4.1247
0.1% SDS	0.57	2.4056	3.63947
1% SDS	2.11175	1.8302	1.3268
