# Supplementary material for: Decellularization of porcine kidney with submicellar concentrations of SDS results in the retention of ECM proteins required for the adhesion and maintenance of human adult renal epithelial cells
Source: Royal Society of Chemistry journal article supplement (doi:10.1039/d1bm01017d), 2022-01-01
Supplement: d1bm01017d3.xlsx [file d1bm01017d3.xlsx]

## Sheet: Mass Spectrometry I
	Spectral Counts
Gene	0.05% SDS	0.075% SDS	1% SDS
HSPG2	453	323	56
LRP2	298	43	10
LAMA5	295	326	90
COL6A3	278	280	203
LAMC1	263	242	89
COL12A1	199	176	38
FBN1	193	235	101
COL6A2	177	228	82
LAMB1	171	156	45
LAMB2	136	93	26
MYH9	127	0	0
LOC100623720	114	126	65
GPX3	100	85	22
TINAG	99	81	45
TINAGL1	97	55	0
CUBN	96	0	0
ATP1A1	83	30	0
NID2	74	60	11
COL14A1	72	41	10
NID1	71	62	34
LOC100302368	71	91	57
MYH10	70	0	0
COL6A5	60	55	27
ASS1	58	15	0
ANPEP	58	43	0
DPP4	53	32	0
TUBB	52	25	0
COL1A1	50	70	55
TUBB4B	50	0	0
MME	50	32	0
VDAC1	49	39	0
AGRN	47	32	0
TGM2	44	30	0
PHB	39	0	0
FGB	39	39	59
TGFBI	39	17	33
EHHADH	38	0	0
FREM2	37	36	0
PHB2	37	0	0
MYH11	36	0	0
COL1A2	35	37	31
ACTB	34	0	0
VDAC2	33	22	0
MAOA	31	20	0
HADHA	31	0	0
ITGB1	31	11	0
SDHA	31	18	0
COL4A2	30	41	28
MAOB	30	18	0
ACTA2	29	19	15
FN1	29	28	48
ENPEP	29	0	0
SDHB	29	20	0
SLA-3	28	18	0
SUSD2	28	12	0
DYSF	27	0	0
TUBA1B	26	16	0
MFGE8	26	19	0
TUBA4A	25	0	0
EZR	25	0	0
VDAC3	25	11	0
TUFM	24	0	0
PC	23	0	0
PCK2	23	0	0
ATP5F1B	23	0	0
FBN2	22	36	11
HAO2	22	0	0
SLC25A5	21	11	0
XPNPEP2	21	12	0
RDX	21	0	0
STOM	20	27	0
LUM	20	13	15
ETFDH	20	0	0
SLC3A2	19	0	0
LOC100520329	19	22	0
ALDOB	19	0	0
ENPP1	19	0	0
DPEP1	19	20	0
TNC	19	0	0
SLC25A13	18	0	0
ATP5F1A	18	0	0
CP	18	0	0
FBLN5	17	18	0
HSD17B10	16	0	0
VTN	16	16	0
LOC100525821	16	12	0
GLUD1	16	0	0
SLC25A6	16	0	0
FGG	16	18	35
ACSM2B	15	0	0
ANXA2	15	47	11
DLST	15	0	0
GNAS	15	0	0
RPS3	15	0	0
SLA-1	15	13	0
SLA-DQB1	15	13	0
EEF1A1	15	0	10
GOT2	15	0	0
GAPDH	15	18	0
PM20D1	15	0	0
LAMA1	15	0	0
BGN	15	0	0
HADHB	14	0	0
SLC25A4	14	12	0
MSN	14	0	0
SLC25A11	14	0	0
BHMT	14	0	0
ANXA6	14	34	0
PECR	14	0	0
IGF2R	13	0	0
FGA	13	18	55
CFH	13	0	0
ITGA3	13	0	0
LAMA2	13	0	0
HSD17B4	13	0	0
LOC100156879	13	0	0
NPNT	13	17	0
LOC100513601	12	0	0
ATP5MG	12	0	0
FRAS1	12	11	0
COLEC12	12	0	0
IDH2	12	0	0
KCP	12	15	0
LAMP1	12	0	0
HNRNPK	12	10	0
ALB	12	13	0
ARF1	12	0	0
DCN	12	0	0
LOC110256505	12	0	0
LOC100622689	12	0	0
RAB10	12	0	0
ACADVL	11	0	0
LOC100624067	11	0	0
NAALADL1	11	0	0
PKM	11	0	0
ALDH3A2	11	0	0
RPS8	11	0	0
ITGA6	11	0	0
SLA-DRB1	11	11	0
COL18A1	11	0	13
KRT18	10	18	16
RPS4X	10	0	0
FREM1	10	0	0
GNAI1	10	0	0
ACTN4	10	10	0
LOC100525869	10	0	0
ANXA4	0	10	0
EMILIN1	0	10	20
SLC25A3	0	16	0
DSP	0	124	68
JUP	0	55	17
DSG1	0	31	23
AHNAK	0	19	15
KRT10	0	77	0
COL4A4	0	12	0
LOC100158003	0	11	0
SLC25A1	0	11	0
COL4A1	0	10	0
SLA-DQA1	0	10	0
ARG1	0	10	0

## Sheet: Mass Spectrometry II
	Spectral Counts
Gene	0.05% SDS	0.075% SDS	0.1% SDS	1% SDS
COL6A3	987	435	1135	377
HSPG2	787	423	821	257
COL12A1	554	302	568	110
COL6A2	364	202	397	154
FGA	341	270	408	245
LAMA5	310	189	325	146
FGB	280	227	307	173
COL6A5	271	121	315	121
LOC100623720	253	172	321	126
GPX3	238	69	311	37
LAMC1	233	225	235	119
COL14A1	216	121	217	40
FGG	209	80	217	136
MYH9	198	86	63	35
TINAG	196	116	239	70
LAMB1	179	139	170	91
LRP2	168	75	59	191
MYH10	132	59	39	18
TGM2	130	93	125	15
FN1	124	63	144	111
COL1A1	121	34	88	74
NID2	115	105	121	36
FBN1	111	113	69	182
LAMB2	108	59	96	56
AGRN	95	69	91	46
NID1	93	79	130	136
LOC100302368	64	68	68	305
CUBN	43	22	8	112
DSP	15	32	71	102
KRT1	0	0	113	224
ACO2	16	9	6	4
ACTA2	44	0	0	21
ACTB	54	35	43	24
ACTN1	27	8	18	0
ACTN4	29	9	19	7
AHNAK	14	24	13	12
AIFM1	13	9	12	0
ALB	15	16	8	19
ALDH3A2	18	16	6	0
ALDOA	10	13	3	1
ALDOB	26	7	3	10
AMN	10	4	1	0
ANPEP	57	20	39	6
ANXA1	22	17	29	2
ANXA11	14	16	20	5
ANXA2	54	55	72	14
ANXA4	16	22	31	0
ANXA6	39	47	96	0
ANXA7	5	10	8	2
AOC1	37	19	38	7
AP2M1	9	10	5	0
APOH	18	3	6	0
ARF1	10	0	8	0
ASS1	39	26	22	5
ATP1A1	75	62	35	7
ATP1A2	0	37	0	0
ATP1B1	11	4	4	0
ATP2A2	10	6	2	0
ATP5F1A	34	22	19	18
ATP5MG	6	11	6	0
BCAP31	13	3	11	0
BGN	45	36	36	5
BHMT	18	13	18	3
C3	48	39	80	23
C9	12	4	11	0
CAND1	7	6	12	0
CD81	9	16	8	0
CHCHD3	10	0	0	0
CKAP4	22	3	0	0
CLTC	8	5	14	9
CLU	26	11	24	2
COL11A1	34	9	25	0
COL15A1	5	5	7	18
COL18A1	32	2	28	52
COL1A2	39	15	29	56
COL21A1	10	0	8	1
COL22A1	10	0	0	0
COL2A1	13	12	8	7
COL3A1	19	11	18	13
COL4A1	25	28	29	3
COL4A2	30	29	35	28
COL5A1	51	2	27	17
COL6A6	18	2	19	7
COLEC12	20	6	5	0
CP	24	11	11	0
CPM	13	7	5	0
CPNE3	7	8	10	0
DAB2	11	8	10	0
DCN	59	41	56	9
DDX17	22	10	16	9
DDX3X	16	6	19	3
DDX5	10	5	8	0
DES	31	28	37	14
DOT1L	6	0	23	0
DPEP1	44	23	32	8
DPP4	25	12	11	4
DPT	11	7	11	9
DSG1	3	4	12	18
DYSF	23	7	2	0
ECHS1	12	3	5	3
ECM1	9	4	14	0
EEF1A1	17	4	14	11
EEF2	10	6	7	2
EHHADH	50	22	26	6
EMILIN1	59	29	70	74
ENG	14	3	8	0
ENPEP	13	17	11	7
ENTPD1	11	3	0	0
EZR	38	16	22	4
FLNA	38	25	26	22
FLOT1	31	12	3	0
FLOT2	26	14	4	0
FREM1	7	9	12	0
FREM2	50	35	55	9
GAPDH	54	27	27	10
GGT1	10	4	10	0
GLUD1	12	4	10	3
GNAI2	13	4	3	0
GNAS	12	4	0	0
GOT2	11	5	5	2
HADH	15	6	7	5
HADHA	34	16	12	5
HAO2	15	12	7	0
HBB	16	11	28	8
HIST1H2BD	76	5	54	5
HNRNPA2B1	9	8	17	6
HNRNPK	35	28	30	9
HRG	11	8	12	1
HSD17B10	12	1	8	2
HSPA12B	5	0	12	0
HSPA8	10	9	10	7
HSPB1	17	3	10	4
HSPD1	2	0	0	10
HTRA2	9	4	13	0
IGFBP7	8	8	16	5
IMMT	17	3	0	0
IST1	13	0	2	0
ITGA1	15	14	11	0
ITGA6	22	13	11	0
ITGAV	10	5	0	0
ITGB1	46	25	24	0
ITGB2	13	10	9	0
ITIH4	18	18	33	4
JUP	2	8	11	36
KRT18	15	19	23	26
KRT19	21	21	25	32
KRT23	0	0	13	0
KRT27	28	0	0	0
KRT8	27	19	47	51
LAMA1	64	50	59	25
LAMA2	21	15	23	0
LAMA4	16	18	17	5
LMNA	28	15	6	5
LOC100152327	10	6	9	8
LOC100158121	39	27	32	7
LOC100513601	13	0	6	0
LOC100520329	0	33	29	0
LOC100525821	85	31	54	19
LOC100621538	37	0	0	0
LOC100622689	16	16	11	0
LOC100738859	74	5	53	0
LOC110256000	30	33	33	0
LOC396781	5	13	12	7
LRP1	25	8	3	0
LUM	20	12	16	23
MAOA	19	10	14	0
MAOB	22	9	9	0
MATN2	9	8	18	0
MDH2	13	1	7	2
MFGE8	13	3	13	0
MME	84	41	20	1
MSN	42	24	25	0
MYH11	31	0	0	5
MYH14	11	0	4	0
MYO1C	10	7	8	0
NES	4	4	1	16
NNT	18	12	19	0
NRAP	0	10	0	0
OAS2	8	11	4	0
OGN	11	7	3	0
PAPLN	41	37	54	22
PC	14	8	11	8
PCBP1	21	0	24	7
PCBP2	16	4	23	5
PCK2	6	3	7	12
PHB	28	20	3	0
PHB2	33	18	6	0
PKM	17	14	12	5
PLEC	6	4	0	14
PLG	25	6	16	6
POSTN	13	4	14	2
PPIB	21	13	17	0
PRDX1	8	11	14	10
PRELP	27	19	30	2
PRXL2A	12	4	5	0
RAB10	14	0	9	0
RAP1A	13	2	5	0
RDX	20	8	13	0
RPL14	14	12	9	0
RPL17	18	0	9	0
RPL18	14	14	11	1
RPL3	14	2	10	0
RPL4	15	6	7	2
RPL6	14	5	13	0
RPL7	10	2	5	0
RPN1	16	13	14	0
RPN2	16	10	9	0
RPS16	13	1	5	0
RPS3	18	5	8	0
RPS4X	14	10	3	0
RPS7	12	2	5	0
RPS8	13	8	7	0
RPS9	13	10	6	0
SCARB2	11	2	9	0
SDHA	32	5	22	1
SDHB	16	14	13	0
SEC31A	8	8	10	1
SERPINF2	6	3	10	2
SERPINH1	11	2	5	0
SFPQ	13	4	9	0
SLA-1	18	19	12	0
SLA-2	0	14	0	0
SLA-3	9	13	9	0
SLA-DQA1	17	9	15	0
SLA-DQB1	17	10	11	0
SLA-DRA	17	1	16	0
SLA-DRB1	21	4	20	0
SLC25A13	10	3	3	0
SLC25A4	14	0	11	0
SLC25A5	16	6	0	0
SLC25A6	16	7	8	2
SLC3A2	25	7	9	0
SPTAN1	25	19	7	36
SPTBN1	13	8	8	18
STOM	27	20	22	0
SUSD2	12	8	14	0
TGFBI	59	43	51	54
THSD7A	11	6	10	1
TINAGL1	48	30	50	6
TLN1	13	6	7	8
TMED10	13	7	6	0
TMEM43	13	0	5	0
TNC	12	5	7	0
TPM3	7	9	16	3
TPM4	5	6	13	0
TUBA1B	57	26	43	13
TUBA4A	53	25	38	9
TUBB	51	21	42	11
TUBB2B	0	0	30	0
TUBB4B	40	13	32	6
TUFM	17	7	10	0
VDAC1	66	25	72	2
VDAC2	40	17	31	3
VDAC3	18	2	16	0
VIM	70	31	43	44
VTN	24	6	23	2
VWA1	10	9	12	5
XPNPEP2	19	11	15	4
