# Supplementary material for: Decellularization of porcine kidney with submicellar concentrations of SDS results in the retention of ECM proteins required for the adhesion and maintenance of human adult renal epithelial cells
Source: Royal Society of Chemistry journal article supplement (doi:10.1039/d1bm01017d), 2022-01-01
Supplement: d1bm01017d4.xlsx [file d1bm01017d4.xlsx]

## Sheet: Sheet1
Gene Name	0.05% SDS	0.075% SDS	0.1% SDS
HSPG2	432	223	420
COL6A3	413	288	523
COL12A1	190	64	143
COL6A1	142	128	182
LAMA5	139	133	190
COL6A2	109	79	115
LAMB2	100	67	129
TGFBI	93	64	126
FBN1	88	75	138
C9	81	72	109
EMILIN1	75	44	102
VTN	72	71	103
KRT1	53	136	142
AGRN	54	45	41
BGN	52	32	59
COL14A1	72	46	66
COL15A1	15	11	25
COL18A1	41	45	69
COL1A1	45	44	60
COL1A2	26	24	28
COL4A1	20	2	20
COL4A2	20	29	44
COL4A3	12	4	8
COL4A5	26	8	28
DCN	28	36	45
DPT	11	12	11
FGA	52	48	82
FGB	41	47	61
FGG	56	47	48
FN1	30	44	75
FRAS1	11	11	12
LAMB1	65	16	55
LAMC1	88	48	78
LUM	10	4	10
MFGE8	12	12	17
NID1	49	51	69
NID2	17	10	18
OGN	11	6	2
POSTN	18	22	63
PRELP	15	13	22
TINAG	63	45	63
TINAGL1	40	39	58
TNC	36	9	17
VCAN	11	23	21
VWA1	11	11	18
AMBP	9	3	12
ANXA1	16	1	17
ANXA11	16	10	18
ANXA2	48	43	68
ANXA4	35	27	47
ANXA6	74	53	90
ANXA7	16	7	15
FREM2	41	45	72
ITIH5	0	2	10
S100A8	10	18	17
S100A9	7	5	15
SERPINA1	57	47	60
TGM2	21	3	17
ACO2	14	0	0
ACTA1	0	24	31
ACTA2	58	0	0
ACTB	69	24	38
ACTN1	35	0	19
ACTN4	54	8	21
ALDH2	13	0	0
ALDH4A1	11	0	0
ALDH6A1	21	4	5
ALDOA	12	0	0
ALDOB	22	0	2
AOC1	16	21	21
AOC3	41	39	45
APCS	33	31	44
APOA4	22	18	25
APOE	66	69	59
ASPN	35	22	33
ASS1	55	6	15
ATP1A1	55	5	31
ATP5F1A	51	0	12
ATP5F1B	74	0	12
C3	33	36	44
C4A	9	0	14
C4B	6	8	13
C5	38	35	24
C6	21	24	40
C7	20	31	42
C8A	28	28	42
C8B	12	19	33
C8G	15	6	16
CLTC	20	3	25
CLU	37	38	60
CPA3	10	9	8
CRAT	12	0	0
CRYZ	11	0	0
DES	28	0	13
DNASE1L3	2	9	10
DPP4	19	0	11
DSP	0	28	36
ECHDC2	11	0	0
EEF1A1	22	7	15
EZR	40	0	22
FLNA	55	27	31
FLOT1	10	0	4
FLOT2	12	0	5
GAPDH	28	17	22
GNAS	16	0	0
GPX3	59	52	38
HADH	10	0	0
HADHA	13	0	0
HBA2	0	3	10
HBB	10	16	22
HBD	0	0	13
HIST1H2AC	16	0	11
HIST1H2BO	10	6	11
HIST2H2AA4	18	4	10
HIST2H2BF	10	6	11
HIST2H3A	12	4	11
HIST2H4B	19	13	32
HSP90AA1	11	0	3
HSPA1A	12	2	6
HSPA8	13	0	6
HSPD1	11	0	0
IDH2	10	0	0
ITGB1	21	4	7
JUP	0	10	11
KRT14	20	55	68
KRT16	16	50	67
KRT17	14	23	35
KRT19	11	0	19
KRT2	33	74	69
KRT5	11	57	65
KRT6A	0	45	52
KRT6B	0	0	53
KRT6C	0	45	0
KRT74	0	13	0
KRT77	0	17	10
KRT78	0	14	13
LGALS3BP	10	9	12
LMNA	13	3	0
LRP1	30	0	0
MAOB	12	7	3
MDH2	11	0	0
MME	20	0	3
MSN	34	9	24
MYH10	46	0	7
MYH11	55	5	0
MYH9	72	7	12
MYO1C	11	5	7
NNT	16	0	4
PC	57	2	6
PCK2	11	5	10
PHB	48	0	8
PHB2	38	0	18
PPIB	17	1	2
RACK1	11	0	0
RAP1A	10	3	4
RDX	34	0	0
RPL11	14	0	0
RPS3	10	0	2
SDHA	16	0	13
SDHB	14	0	11
SHMT2	10	0	0
SLC25A13	19	0	3
SLC25A3	8	5	12
SLC25A5	17	0	20
SLC25A6	17	0	20
SPP2	7	11	13
STOM	14	12	11
TAGLN	15	8	10
TIMP3	9	21	23
TLN1	12	1	7
TUBA4A	32	7	18
TUBB	89	24	40
TUBB4B	92	26	40
TUFM	14	11	11
UMOD	32	48	42
UQCRC1	10	0	0
VDAC1	34	16	21
VDAC2	27	13	22
VDAC3	15	0	10
VIM	36	33	42
