# Supplementary material for: Decellularization of porcine kidney with submicellar concentrations of SDS results in the retention of ECM proteins required for the adhesion and maintenance of human adult renal epithelial cells
Source: Royal Society of Chemistry journal article supplement (doi:10.1039/d1bm01017d), 2022-01-01
Supplement: d1bm01017d5.xlsx [file d1bm01017d5.xlsx]

## Sheet: Sheet1
	Mean Pixel Density/ g Tissue Weight
	0.05% SDS			0.075% SDS			0.1% SDS			1% SDS			Whole Porcine Kidney
Activin A	9.10745	9.84275	34.5103	6.54315	6.19227	36.2085	1.66615	3.68622	18.9625	8.57121	11.7364	10.7134	1180.85	60.847	1880.68
ADAMTS-1	7.72504	14.6611	29.251	5.13437	12.0916	29.8435	1.54528	4.93756	15.5822	6.06576	10.0197	8.88016	1087.82	293.633	1860.73
Angiogenin	5.43331	20.0832	37.4255	2.09985	14.7772	29.1804	0.938236	3.984	11.4138	5.02522	10.4202	8.57534	854.941	389.25	2598.45
Angiopoietin-1	16.9831	24.9875	68.4354	9.99231	18.0879	25.7794	3.92083	8.48951	11.0516	7.55717	10.6855	10.566	2266.03	879.736	4929.4
Angiopoietin-2	100.691	67.4922	115.351	89.6531	49.9214	46.6681	53.5794	25.0948	29.609	26.0797	37.3453	39.4578	9274.02	2505.59	11268.3
Angiostatin/Plasminogen	6.99604	17.0281	47.5517	0.13652	10.8853	28.1059	1.60663	9.97358	17.4055	5.30872	9.72074	6.51895	760.813	862.149	3403.8
Amphiregulin	6.64745	15.1841	57.9916	0.914088	1.41432	21.2491	2.66677	8.08695	16.3953	8.4883	10.8431	10.1449	873.185	686.562	4056.66
Artemin	84.6541	56.4312	97.531	54.7373	35.4108	21.8998	34.4319	15.1093	28.395	19.8437	30.0689	40.0366	6102.27	2492.51	8794.09
Coagulation Factor III	20.7861	21.2472	56.3685	20.3055	9.61213	52.33	11.4066	8.14936	40.5943	16.163	16.3698	17.1753	2215.84	238.188	2618.3
CXCL16	13.3413	10.5068	39.4569	11.1177	0.0401672	37.8341	7.79178	3.87265	39.1216	17.7371	16.6054	16.2958	1405.77	204.195	1973.74
DPPIV	9.65399	11.53	87.7095	13.1402	2.39527	71.6506	5.47973	2.89996	47.9517	6.42996	7.43873	5.14983	1437.22	0	5544.38
EGF	2.50692	11.3417	14.4302	2.82781	7.77877	20.82	1.54163	4.5107	14.0477	4.75484	6.72035	4.8278	467.002	133.506	656.628
EG-VEGF	25.6422	21.9984	56.1311	21.8533	17.7646	42.7122	12.1531	6.74486	26.084	18.1131	26.8384	30.204	2651.53	985.132	4152.19
Endoglin	4.50636	15.8925	19.4725	2.88432	12.7434	18.7746	2.28676	4.98927	11.1109	3.31345	6.83749	7.40359	717.157	552.233	1462.79
Endostatin/Collagen XVIII	6.65422	17.4724	41.7273	0.35169	11.9199	18.5502	1.20916	10.8805	8.74708	4.18896	8.14554	10.1495	556.487	733.734	2236.46
Endothelin-1	172.641	22.2546	147.098	57.934	18.5753	86.5931	27.4902	43.8174	38.1813	9.26045	12.7445	12.8411	5540.06	1368.78	8738.07
FGF acidic	25.6808	26.6893	73.4763	47.4748	3.97786	21.7941	14.0343	9.83885	13.7959	10.6551	14.8664	8.62591	3954.39	1054.72	6047.2
FGF basic	23.5929	148.678	57.6754	86.6047	116.066	10.013	13.1807	64.599	14.4931	4.68639	5.63262	3.72563	8121.17	2333.75	5594.12
FGF-4	1.9279	10.7678	21.6142	1.25822	5.08387	8.90795	1.19571	3.92124	12.3248	9.09139	6.19345	6.77655	445.293	500.42	2447.46
FGF-7	5.51236	4.0144	33.1234	3.73223	6.27781	13.9607	2.7074	6.03806	13.7478	10.5249	11.29	15.2122	886.583	523.191	2924.09
GDNF	9.88952	3.30653	38.2007	10.8639	0	37.3747	6.45612	3.48355	31.0778	9.2863	8.96297	9.01246	897.67	0	1108.63
GM-CSF	13.3304	14.8068	44.0612	16.1437	1.73175	39.203	10.4599	4.34085	38.4974	7.44148	7.11054	7.33771	1429.73	533.017	2815.65
HB-EGF	22.2752	22.5179	69.7682	40.4285	11.2314	58.0766	12.3731	11.6519	38.106	17.4562	17.1023	14.9533	1194.64	0	3178.87
HGF	4.19625	9.34078	18.1555	5.26353	8.04734	23.771	2.07275	5.13735	9.37393	6.8284	8.40187	5.95378	377.987	219.639	1087.42
IGFBP-1	32.2052	35.3613	73.4428	37.3258	22.7101	54.6614	25.4995	12.0707	26.7478	21.3435	29.504	31.1363	3236.82	1481.72	5958.01
IGFBP-2	46.3411	35.7963	69.4714	70.8432	24.6006	36.9359	37.2588	10.2123	12.4395	2.79617	6.87823	4.90323	7022.34	1402.87	7993.44
IGFBP-3	13.6457	22.0829	52.2511	16.2441	14.265	21.0294	8.59259	9.76712	13.4382	7.68379	12.4566	13.0398	1327.5	707.285	4132.04
IL-1beta	17.1622	13.9675	69.2542	11.2653	8.66657	24.6808	8.81863	9.27807	16.8994	3.99043	8.45306	5.37311	1291.45	541.787	3628.25
IL-8	1.61378	9.19039	21.294	1.26095	0	8.47254	1.05129	7.25809	1.44566	2.62016	5.27996	1.89808	442.395	128.012	2595.22
LAP (TGF-beta1)	5.41806	16.029	35.0438	19.1198	3.47566	8.175	5.23425	6.22357	21.1611	3.17349	4.89008	9.93746	711.019	618.56	2771.81
Leptin	6.42305	11.2175	40.2953	11.176	5.79016	16.0114	2.98379	5.82722	11.5973	4.63787	5.34764	6.90985	1198.53	356.219	3117.47
MCP-1	9.62823	0	44.1825	1.06536	2.35467	4.81454	6.12897	1.12007	6.98864	2.94628	4.16277	5.90977	1500.74	336.475	2384.23
MIP-1a	10.8064	19.4534	42.5641	12.3653	0	46.3341	6.41201	2.46205	38.1627	11.9038	10.7958	9.59173	1018.22	370.887	1062.59
MMP-8	11.8363	18.9622	41.2216	16.7548	0	37.9742	11.8821	3.88865	43.2482	13.2591	15.9464	13.115	1439.59	562.276	1410.64
MMP-9	11.639	16.9102	49.7763	42.9342	3.60181	45.3857	12.5991	2.96491	45.7835	16.5229	13.7707	15.5446	1205.38	408.56	3780.31
NRG1-beta1	3.0654	12.8961	15.8241	2.53003	10.628	21.9248	1.67905	4.16156	10.6772	11.2214	10.7762	7.60442	356.48	654.012	1172.66
Pentraxin 3 (PTX3)	7.32452	17.5844	52.4281	11.1584	11.906	43.9659	7.027	6.09552	24.8548	13.9577	18.1188	18.3206	812.932	891.021	4541.62
PD-ECGF	11.862	15.9829	43.3745	13.0862	13.9969	37.1199	7.61252	6.67945	26.8426	12.683	17.7763	16.8606	1278.07	1008.31	4129.13
PDGF-AA	105.506	71.371	110.084	80.1548	59.116	38.4156	54.1812	46.0282	20.2968	2.82327	8.79153	7.82455	632.041	1362.6	2969.69
PDGF-AB/PDGF-BB	6.65446	19.1601	52.3827	12.0126	19.7273	8.78972	3.93225	11.8357	4.63766	1.08917	3.37671	1.66324	345.454	707.486	1835.35
Persephin	31.6015	24.839	78.5466	55.1296	9.25497	22.8646	25.6325	12.7063	16.1349	7.25965	17.0833	13.7484	3574.36	1428.49	7004.74
Platelet Factor 4 (PF4)	12.0554	16.5439	49.9173	39.5205	4.98204	15.6732	27.2794	7.38545	10.8629	4.54301	11.6289	11.7431	1243.37	561.624	3403.03
PlGF	25.9655	8.19136	59.6024	34.7877	7.82284	14.0305	11.5965	7.08928	15.2573	4.39308	11.331	22.0884	2685.66	491.014	4418.29
Prolactin	12.1856	0	43.2017	1.14541	1.15682	11.6084	4.06133	0	17.5299	7.17234	8.60017	16.1416	1374.27	725.508	3681.25
Serpin B5	13.4712	26.0896	48.0537	13.6427	4.26077	39.4043	7.70799	3.98123	35.4368	14.4977	11.7931	12.7591	1147.29	346.781	1612.44
Serpin E1	57.2986	63.5944	81.4155	108.204	21.7919	69.2942	61.317	18.8439	55.7446	15.2224	15.8737	15.1288	6355.18	2020.35	2423.75
Serpin F1	22.3659	23.5024	66.7073	49.3063	8.8001	59.756	25.0793	8.00669	43.6528	15.44	20.3597	16.1579	3479.08	1012.16	5863.56
TIMP-1	6.75907	17.1937	33.3429	13.2021	10.4934	37.8712	6.72692	6.90388	22.4065	14.7956	13.7678	13.3649	726.755	1001.91	2688.92
TIMP-4	3.92866	16.6165	34.9192	4.45482	6.94958	34.1995	3.95117	5.1096	28.7468	9.37079	12.3203	13.1277	710.134	587.36	2720.26
Thrombospondin-1	3.07796	18.1456	34.585	2.16813	9.15987	26.0186	2.21169	6.93048	15.2704	6.00547	10.0178	10.1083	483.037	764.949	3313.18
Thrombospondin-2	13.4352	22.6416	47.0539	13.4389	16.7191	17.5074	6.72634	13.2517	23.0162	8.13038	14.2825	13.7286	1028.27	1330.98	4573.48
uPA	18.8526	14.4713	49.3522	19.4168	10.8165	20.7633	16.4267	9.88042	26.8549	4.67677	10.067	7.58231	1742.04	1086.09	3803.33
Vasohibin	4.77648	15.9051	49.8212	9.91585	0.728004	14.5232	6.02509	9.40117	16.9701	1.51618	5.52633	4.83936	981.169	763.413	3597.5
VEGF	140.649	187.76	138.956	197.645	157.505	40.5597	123.524	93.1532	24.8817	4.74021	20.9039	68.5764	5598.19	655.456	4876.71
VEGF-C	2.2398	0	28.4103	2.27491	5.76085	9.52922	1.77111	5.35798	3.71448	2.63985	3.49363	3.40115	339.231	0	2580.57
