# Supplementary material for: Decellularization of porcine kidney with submicellar concentrations of SDS results in the retention of ECM proteins required for the adhesion and maintenance of human adult renal epithelial cells
Source: Royal Society of Chemistry journal article supplement (doi:10.1039/d1bm01017d), 2022-01-01
Supplement: d1bm01017d9.pdf [file d1bm01017d9.pdf]

7c

| Term ID    | Biological Process (GO)                     | Gene Count | Genes                                                                                                                                     | False Discovery Rate |
|------------|---------------------------------------------|------------|-------------------------------------------------------------------------------------------------------------------------------------------|----------------------|
| GO:0050789 | regulation of biological process            | 25         | AFGF,ANG1,ANGPT1,CCL2,CSF2,DPP4,EDN1,EGF,ENG,FGF7,HBEGF,IGFBP1,IGFBP2,IGFBP3,IL8,INHBA,LEP,PF4,PLG,PRL,SERPINE1,SR-PSOX,TGFB1,TIMP1,VEGFA | 1.84E-21             |
| GO:0009966 | regulation of signal transduction           | 18         | AFGF,CCL2,CSF2,EGF,FGF7,HBEGF,IGFBP1,IGFBP2,IGFBP3,IL8,INHBA,LEP,PF4,PRL,SR-PSOX,TGFB1,TIMP1,VEGFA                                        | 2.93E-20             |
| GO:0042127 | regulation of cell population proliferation | 15         | AFGF,CCL2,CSF2,DPP4,HBEGF,IGFBP2,IGFBP3,IL8,INHBA,LEP,PF4,PRL,TGFB1,TIMP1,VEGFA                                                           | 4.82E-20             |
| GO:0050794 | regulation of cellular process              | 23         | AFGF,ANG1,ANGPT1,CCL2,CSF2,DPP4,EGF,ENG,FGF7,HBEGF,IGFBP1,IGFBP2,IGFBP3,IL8,INHBA,LEP,PF4,PRL,SERPINE1,SR-PSOX,TGFB1,TIMP1,VEGFA          | 4.82E-20             |
| GO:0032502 | developmental process                       | 16         | AFGF,ANG1,ANGPT1,ANGPT2,CCL2,EGF,ENG,HBEGF,IGFBP3,IL8,INHBA,LEP,PRL,SERPINE1,TGFB1,VEGFA                                                  | 5.85E-16             |
| GO:0048856 | anatomical structure development            | 14         | AFGF,ANG1,ANGPT1,ANGPT2,CCL2,EGF,ENG,HBEGF,IL8,INHBA,LEP,PRL,TGFB1,VEGFA                                                                  | 1.47E-13             |
| GO:0030334 | regulation of cell migration                | 9          | AFGF,CCL2,HBEGF,IGFBP3,IL8,PF4,SR-PSOX,TGFB1,VEGFA                                                                                        | 4.91E-13             |
| GO:0032879 | regulation of localization                  | 11         | AFGF,CCL2,HBEGF,IGFBP3,IL8,INHBA,LEP,PF4,SR-PSOX,TGFB1,VEGFA                                                                              | 7.69E-12             |
| GO:0071363 | cellular response to growth factor stimulus | 7          | AFGF,CCL2,ENG,FGF7,IL8,TGFB1,VEGFA                                                                                                        | 4.74E-11             |
| GO:0001525 | angiogenesis                                | 6          | AFGF,ANG1,ANGPT1,ANGPT2,ENG,VEGFA                                                                                                         | 1.67E-10             |
| GO:0035295 | tube development                            | 7          | AFGF,ANG1,ANGPT1,ANGPT2,ENG,IL8,VEGFA                                                                                                     | 3.84E-10             |
| GO:0030154 | cell differentiation                        | 10         | AFGF,ANG1,ANGPT1,ANGPT2,CCL2,IGFBP3,INHBA,LEP,TGFB1,VEGFA                                                                                 | 5.25E-10             |
| GO:0060326 | cell chemotaxis                             | 6          | CCL2,HBEGF,IL8,PF4,SR-PSOX,VEGFA                                                                                                          | 9.99E-10             |
| GO:0040008 | regulation of growth                        | 7          | CSF2,IGFBP1,IGFBP2,IGFBP3,INHBA,SR-PSOX,TGFB1                                                                                             | 1.11E-09             |
| GO:0006950 | response to stress                          | 10         | AFGF,CCL2,HBEGF,IL8,PF4,PLG,PRL,SR-PSOX,TGFB1,VEGFA                                                                                       | 2.03E-09             |

| Term ID    | Cellular Component (GO)        | Gene Count | Genes                                                                                                                                         | False Discovery Rate |
|------------|--------------------------------|------------|-----------------------------------------------------------------------------------------------------------------------------------------------|----------------------|
| GO:0005576 | extracellular region           | 25         | AFGF,ANG1,ANGPT1,ANGPT2,CCL2,CSF2,DPP4,EDN1,FGF7,HBEGF,IGFBP1,IGFBP2,IGFBP3,IL8,INHBA,LEP,PF4,PLAU,PLG,PRL,SERPINE1,SR-PSOX,TGFB1,TIMP1,VEGFA | 6.24E-29             |
| GO:0009986 | cell surface                   | 4          | DPP4,HBEGF,TGFB1,VEGFA                                                                                                                        | 3.82E-05             |
| GO:0005622 | intracellular                  | 11         | AFGF,ANG1,CCL2,CSF2,DPP4,IGFBP3,IL8,INHBA,LEP,TGFB1,VEGFA                                                                                     | 4.84E-05             |
| GO:0071944 | cell periphery                 | 5          | AFGF,DPP4,EGF,ENG,HBEGF                                                                                                                       | 0.0083               |
| GO:0016021 | integral component of membrane | 5          | DPP4,EGF,ENG,HBEGF,SR-PSOX                                                                                                                    | 0.0098               |
| GO:0016020 | membrane                       | 6          | DPP4,EGF,ENG,HBEGF,SR-PSOX,VEGFA                                                                                                              | 0.0122               |
| GO:0005634 | nucleus                        | 4          | AFGF,ANG1,IGFBP3,TGFB1                                                                                                                        | 0.0197               |
| GO:0031410 | cytoplasmic vesicle            | 3          | ANG1,DPP4,VEGFA                                                                                                                               | 0.0197               |
| GO:0043227 | membrane-bounded organelle     | 6          | AFGF,ANG1,DPP4,IGFBP3,TGFB1,VEGFA                                                                                                             | 0.0197               |

| Term ID    | Molecular Function (GO)               | Gene Count | Genes                                                                                                                          | False Discovery Rate |
|------------|---------------------------------------|------------|--------------------------------------------------------------------------------------------------------------------------------|----------------------|
| GO:0005102 | signaling receptor binding            | 19         | AFGF,ANGPT1,ANGPT2,CCL2,CSF2,DPP4,EGF,ENG,FGF7,HBEGF,IL8,INHBA,LEP,PF4,PRL,SR-PSOX,TGFB1,TIMP1,VEGFA                           | 1.50E-24             |
| GO:0005515 | protein binding                       | 23         | AFGF,ANG1,ANGPT1,ANGPT2,CCL2,CSF2,DPP4,EGF,ENG,FGF7,HBEGF,IGFBP1,IGFBP2,IGFBP3,IL8,INHBA,LEP,PF4,PRL,SR-PSOX,TGFB1,TIMP1,VEGFA | 1.50E-24             |
| GO:0048018 | receptor ligand activity              | 15         | AFGF,CCL2,CSF2,EGF,FGF7,HBEGF,IL8,INHBA,LEP,PF4,PRL,SR-PSOX,TGFB1,TIMP1,VEGFA                                                  | 2.83E-20             |
| GO:0008083 | growth factor activity                | 9          | AFGF,CSF2,EGF,FGF7,HBEGF,INHBA,TGFB1,TIMP1,VEGFA                                                                               | 6.11E-15             |
| GO:0005125 | cytokine activity                     | 9          | CCL2,CSF2,IL8,INHBA,PF4,SR-PSOX,TGFB1,TIMP1,VEGFA                                                                              | 2.35E-13             |
| GO:0005539 | glycosaminoglycan binding             | 6          | AFGF,ENG,FGF7,HBEGF,PF4,VEGFA                                                                                                  | 1.87E-09             |
| GO:0008201 | heparin binding                       | 5          | AFGF,FGF7,HBEGF,PF4,VEGFA                                                                                                      | 6.47E-08             |
| GO:0008009 | chemokine activity                    | 4          | CCL2,IL8,PF4,SR-PSOX                                                                                                           | 3.34E-07             |
| GO:0031994 | insulin-like growth factor I binding  | 3          | IGFBP1,IGFBP2,IGFBP3                                                                                                           | 4.10E-06             |
| GO:0031995 | insulin-like growth factor II binding | 3          | IGFBP1,IGFBP2,IGFBP3                                                                                                           | 4.10E-06             |

| Term ID  | KEGG Pathway                                         | Gene Count | Genes                                                                     | False Discovery Rate |
|----------|------------------------------------------------------|------------|---------------------------------------------------------------------------|----------------------|
| ssc04151 | PI3K-Akt signaling pathway                           | 14         | AFGF,ANGPT1,ANGPT2,AREG,EGF,FGF4,FGF7,HGF,PDGFA,PGF,PRL,THBS1,THBS2,VEGFA | 4.92E-13             |
| ssc04060 | Cytokine-cytokine receptor interaction               | 12         | CCL2,CSF2,EGF,HGF,IL8,LEP,PDGFA,PF4,PRL,SR-PSOX,TGFB1,VEGFA               | 3.18E-12             |
| ssc04015 | Rap1 signaling pathway                               | 11         | AFGF,ANGPT1,ANGPT2,EGF,FGF4,FGF7,HGF,PDGFA,PGF,THBS1,VEGFA                | 1.53E-11             |
| ssc04010 | MAPK signaling pathway                               | 12         | AFGF,ANGPT1,ANGPT2,AREG,EGF,FGF4,FGF7,HGF,PDGFA,PGF,TGFB1,VEGFA           | 1.63E-11             |
| ssc04014 | Ras signaling pathway                                | 10         | AFGF,ANGPT1,ANGPT2,EGF,FGF4,FGF7,HGF,PDGFA,PGF,VEGFA                      | 7.16E-10             |
| ssc04066 | HIF-1 signaling pathway                              | 7          | ANGPT1,ANGPT2,EDN1,EGF,SERPINE1,TIMP1,VEGFA                               | 2.67E-08             |
| ssc04933 | AGE-RAGE signaling pathway in diabetic complications | 7          | CCL2,EDN1,F3,IL8,SERPINE1,TGFB1,VEGFA                                     | 2.67E-08             |
| ssc04510 | Focal adhesion                                       | 7          | EGF,HGF,PDGFA,PGF,THBS1,THBS2,VEGFA                                       | 1.01E-06             |
| ssc04115 | p53 signaling pathway                                | 4          | IGFBP3,SERPINE1,SERPINE1,THBS1                                            | 6.74E-05             |
| ssc04630 | Jak-STAT signaling pathway                           | 5          | CSF2,EGF,LEP,PDGFA,PRL                                                    | 8.16E-05             |
