# Supplementary material for: Decellularization of porcine kidney with submicellar concentrations of SDS results in the retention of ECM proteins required for the adhesion and maintenance of human adult renal epithelial cells
Source: Royal Society of Chemistry journal article supplement (doi:10.1039/d1bm01017d), 2022-01-01
Supplement: d1bm01017d12.xlsx [file d1bm01017d12.xlsx]

## Sheet: Sheet1
Whole Pig Kidney
Gene	Spectral Counts
PCK2	119
LOC100302368	104
ALB	101
TUBB4B	95
TUBB	94
ALDOB	86
SPTAN1	85
GLUD1	78
BHMT	77
ACTB	77
HSP90AA1	77
LOC100624785	74
ACTA2	74
HSP90AB1	73
COL6A3	73
ASS1	72
AKR1A1	67
ALDH1L1	65
PC	65
HSPD1	63
DMGDH	62
ALDH6A1	57
BHMT2	56
EZR	55
ATP5F1B	53
ACTN4	53
ATP5F1A	51
HSPA8	50
IDH2	50
CAT	50
TCOF1	50
TRAP1	48
HADHA	47
GAPDH	46
ALDH9A1	46
HSD17B4	45
ACADM	45
SPTBN1	45
ACY1	44
PHB	44
EHHADH	44
LMNA	43
PCK1	43
KRT18	43
LOC110255312	43
TUBB6	42
DDX17	42
SARDH	42
TF	42
ALDH4A1	42
DES	41
LOC396781	40
HSP70.2	40
NDUFS1	39
HNRNPK	39
NDUFV3	39
HSPA5	39
MDH2	38
ALDH2	38
KRT8	38
RDX	38
LAP3	38
KRT19	37
LRP2	37
PTER	36
ALDH1B1	36
SHMT2	36
IDH1	36
TKT	35
SELENBP1	35
VIM	35
GALM	35
VIL1	35
ACO2	34
FTCD	34
AIFM1	33
AKR7A2	33
HADH	33
MTHFD1	32
HSP90B1	32
SDHA	32
FGG	31
ANXA6	31
ACO1	31
LOC100622246	31
ALDH1A1	31
CRYL1	30
DDX5	30
PGK1	30
LOC100525821	30
GATM	30
HADHB	30
PDIA3	29
FAH	29
GOT2	29
NIT2	29
LMNB2	29
HBB	29
GOT1	28
PCCB	28
ENO1	28
GSTO1	27
EHD4	27
MSN	27
DLST	27
PDHA1	27
ASL	27
ANXA2	27
ANXA11	27
P4HB	26
HSPG2	26
LAMC1	26
MDH1	26
TUBA1B	26
ACADS	26
VCL	26
RIDA	25
NID2	25
HSD17B10	25
SCP2	25
HSPA9	25
UBA1	24
PKM	24
AOC1	24
TST	24
MVP	24
TUBA4A	24
PEBP1	24
FGB	24
EEF2	24
TPI1	24
LOC100522130	23
PDHB	23
APOA1	23
PEPD	23
DPYS	23
BBOX1	23
FABP3	23
DDX1	22
ANXA7	22
FABP3	22
YWHAE	22
GK	22
DAO	22
PHGDH	22
PRDX3	22
LMNB1	22
VCP	21
AKR1C4	21
CRYZ	21
LOC100522678	21
LOC110259958	21
SNRNP70	21
CNDP1	21
ADHFE1	20
ABAT	20
ANXA4	20
PRDX2	20
ATP6V1B1	20
VDAC2	20
HNRNPA2B1	20
BPHL	20
YWHAZ	20
CKB	20
ATP6V1A	19
LOC100156879	19
IQGAP2	19
DNM2	19
ACADSB	19
CCT3	19
PPIA	19
LOC100152327	19
LOC110255927	19
BDH2	19
PCCA	19
GPT2	19
LDHB	19
PRDX5	18
PRDX1	18
GDI2	18
ETFB	18
CALB1	18
FBP1	18
HDGFL2	18
NID1	18
HNRNPF	18
C3	18
LONP1	18
HAO1	17
FH	17
ANXA5	17
HNRNPM	17
ITIH4	17
HP	17
CNDP2	17
CP	17
ACTN1	17
ST13	17
VDAC1	17
CCT5	16
FGA	16
YWHAG	16
PGM1	16
GSS	16
DDX3X	16
VTN	16
HPX	16
SLC9A3R1	16
DAB2	16
DDAH1	16
AARS	16
OPA1	15
SNX12	15
KYAT3	15
USP5	15
SCRN2	15
HAO2	15
RPSA	15
LOC396685	15
ECHS1	15
PECR	15
EEF1A1	15
SHMT1	15
CES1	15
PPP1R7	15
RTF1	15
NOLC1	15
YWHAB	15
PPIB	14
ETFDH	14
ADH5	14
PRKAR2A	14
CCT6A	14
ALDOA	14
SORD	14
SDHB	14
GPD1	14
CCT2	14
BCLAF1	14
UBE2N	14
HSDL2	14
PHB2	14
CUBN	14
RPS3	14
NPC2	14
SRSF1	14
HSPB1	14
AGXT2	14
OGDH	13
ERP29	13
NIT1	13
HAAO	13
DDC	13
DLAT	13
EPHX2	13
GMPR2	13
AGXT	13
SUOX	13
LOC396684	13
NDUFV1	13
TUFM	13
TLN1	13
PDIA4	13
LASP1	13
PLG	13
UPB1	13
PCBP1	13
ATP5F1C	13
MIF	13
SNX2	13
PSMB6	13
ANPEP	13
COX6B	13
IQGAP1	13
CALR	13
PARK7	13
CTSB	12
SRSF6	12
TINAG	12
A2M	12
EIF4A2	12
ACSM2B	12
TAGLN2	12
LOC106504547	12
OXCT1	12
LOC100519130	12
MYL6	12
RUVBL2	12
CS	12
GPX3	12
NLN	12
PTGR2	12
TPMT	12
MPP1	12
IVD	12
RGN	12
GCDH	12
ATP6V1B2	12
HIBADH	12
HSPA4	12
ACSF3	12
THRAP3	12
SNX3	12
ACAA1	12
SUCLG2	12
HNRNPR	12
ETFA	11
ZRANB2	11
HOGA1	11
ATP5PO	11
CORO1B	11
CGNL1	11
SOD1	11
ACIN1	11
TCP1	11
PFN1	11
ALDH5A1	11
PDIA6	11
LOC733637	11
LOC100038329	11
ACADL	11
AK1	11
ACADVL	11
LOC110255331	11
RPS9	11
NPM1	11
SH3GLB2	11
LOC100624067	11
SDSL	11
PDZK1	11
GPD1L	11
ACSS3	11
LUM	11
CFH	11
AP3B1	11
DPP4	11
SRRM2	11
PDCD6IP	10
SLC25A6	10
RPS16	10
SRSF2	10
SND1	10
SFPQ	10
ATP5MG	10
TALDO1	10
HNRNPH3	10
HINT2	10
HIST1H2BD	10
COL18A1	10
MME	10
GATD3A	10
PCBP2	10
LOC100156325	10
QDPR	10
RACK1	10
AKR1C3	10
LUC7L	10
THOP1	10
SOD2	10
RPS8	10
RPS25	10
SERPINB1	10
LOC100517803	10
COTL1	10
CCT8	10
FKBP4	10
YWHAQ	10
AK3	10
TXNDC17	10
FN1	10
