# Supplementary figures and images for: Decellularization of porcine kidney with submicellar concentrations of SDS results in the retention of ECM proteins required for the adhesion and maintenance of human adult renal epithelial cells
Source: Royal Society of Chemistry journal article supplement (doi:10.1039/d1bm01017d), 2022-01-01

### Supplementary Figure 5

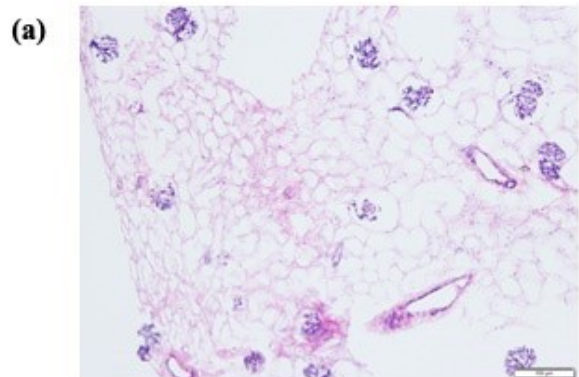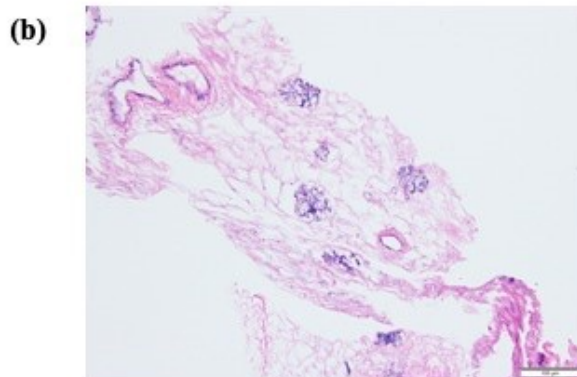

Supplement: d1bm01017d10.pdf [file d1bm01017d10.pdf]

### Supplementary Figure 3

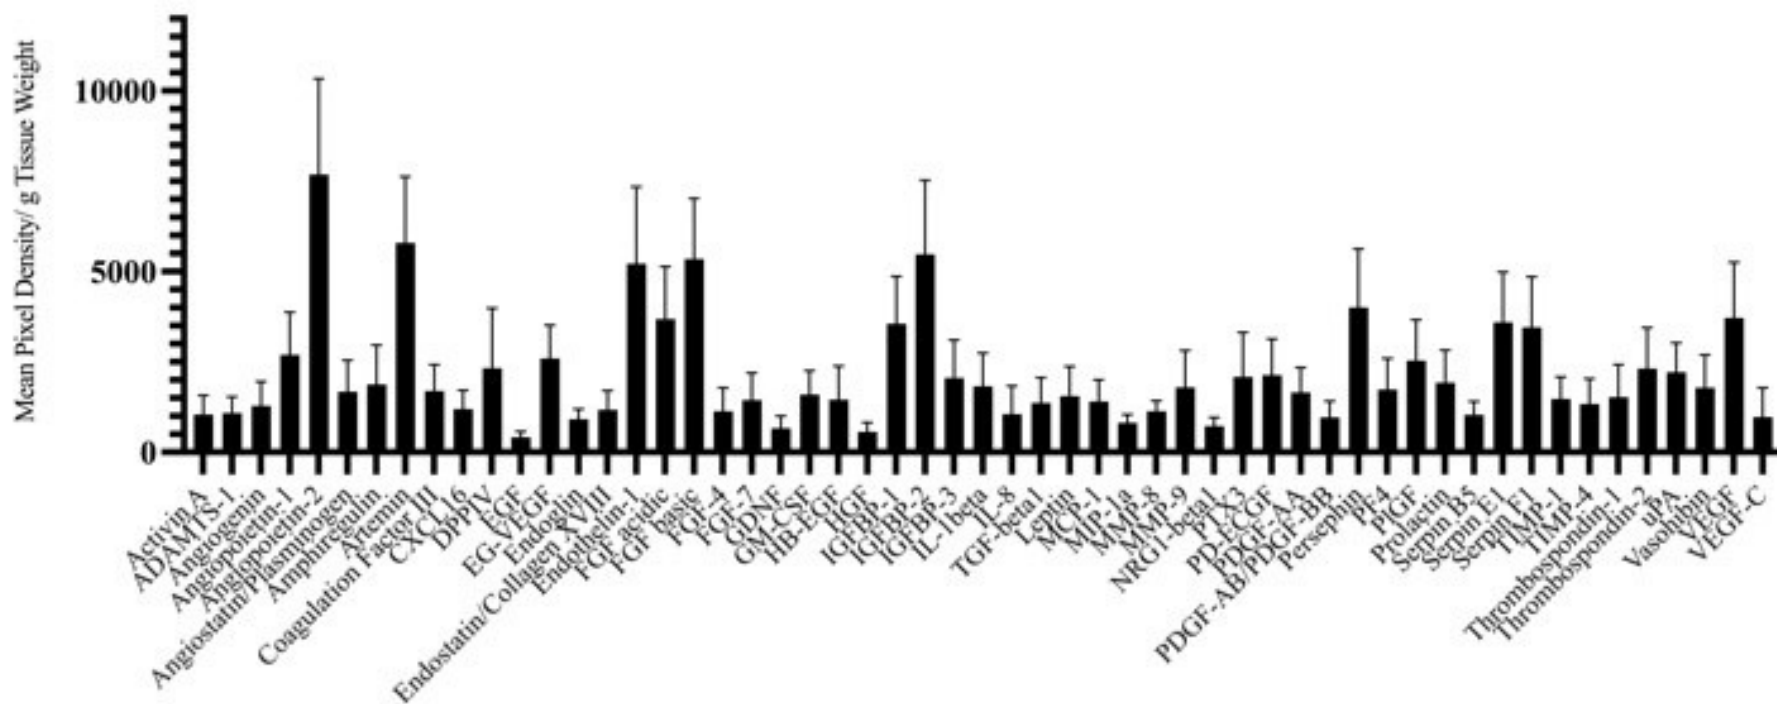

Supplement: d1bm01017d8.pdf [file d1bm01017d8.pdf]
